# Supplementary material
Source: publisher figshare collection journal article supplement (https://sage.figshare.com/ndownloader/files/24061632)
Supplement: Supplementary file 1 [file 24061632]

visual	cubes	paper	flags	general	paragrap	sentence	wordc	wordm	addition	code	counting	straight	wordr	numberr	figurer	object	numberf	figurew
23	19	13	4	46	10	17	22	10	69	65	82	156	173	91	96	8	2	10
33	22	12	17	43	8	17	30	10	65	60	98	195	174	81	106	9	15	17
34	24	14	22	36	11	19	27	19	50	49	86	228	168	84	101	1	7	16
29	23	12	9	38	9	19	25	11	114	59	103	144	130	84	101	10	15	14
16	25	11	10	51	8	25	28	24	112	54	122	160	184	98	99	9	9	15
30	25	12	20	42	10	23	28	18	94	84	113	201	188	86	116	10	10	16
36	33	19	36	69	17	25	42	41	129	96	139	333	192	95	118	16	19	20
28	25	10	9	35	10	18	29	11	96	83	95	174	168	97	113	5	6	16
30	25	15	11	32	11	21	35	8	103	67	114	197	168	84	107	6	4	7
20	25	13	6	39	9	21	27	16	89	49	101	178	181	74	97	7	9	15
27	26	13	6	27	10	16	25	13	88	35	107	137	187	95	115	7	7	15
32	21	16	8	27	1	7	29	11	103	62	136	154	173	100	106	3	18	4
38	31	18	12	29	10	11	30	14	83	57	108	201	181	90	114	9	8	17
17	21	7	6	35	5	10	11	10	99	65	87	147	166	94	90	10	6	14
34	28	20	24	56	14	22	29	26	49	34	84	171	169	96	105	4	14	17
25	31	12	18	37	7	12	18	11	65	53	80	125	186	97	113	9	8	18
33	31	12	30	48	11	23	29	18	66	54	113	186	174	86	111	10	12	9
40	23	15	20	65	10	23	23	35	72	86	104	222	174	88	102	7	11	18
30	22	13	20	49	8	17	26	20	95	66	110	161	188	90	94	5	11	17
36	28	19	22	59	13	24	33	36	82	79	103	205	193	98	117	17	14	20
24	16	16	14	56	5	17	27	11	106	49	80	118	164	84	92	6	9	13
40	26	17	26	56	13	24	39	25	88	69	121	225	191	95	105	11	16	18
30	24	16	19	50	14	26	28	24	112	69	115	185	184	87	87	9	8	19
42	27	17	27	25	7	13	17	4	126	115	200	236	198	94	116	21	19	20
33	27	13	16	29	8	17	29	13	68	63	116	219	159	84	104	6	8	13
32	22	12	15	39	9	20	26	17	74	79	118	191	180	79	93	3	7	14
31	21	13	5	55	13	19	26	19	96	87	121	180	162	79	100	1	2	14
27	23	11	4	24	9	11	24	7	55	68	118	178	173	92	102	3	11	14
31	23	13	11	44	4	16	30	16	81	60	128	189	166	89	99	1	8	18
31	34	13	3	49	9	19	26	17	51	88	92	182	179	91	100	2	7	19
17	30	14	13	46	9	17	23	13	52	53	94	143	165	77	94	2	10	17
30	20	14	13	51	9	20	30	21	108	68	113	180	181	90	111	9	8	19
28	19	15	8	33	9	14	27	20	81	68	116	159	181	91	98	8	6	15
19	22	14	8	18	5	12	21	4	50	53	72	162	178	89	100	3	4	12
28	20	12	14	31	8	15	30	8	100	66	144	205	156	74	101	6	12	16
38	25	13	13	41	9	23	31	15	56	67	130	198	178	96	96	8	9	17
34	28	14	10	48	9	22	28	20	81	76	96	199	171	88	101	2	9	17
18	22	9	5	20	2	4	10	2	30	19	61	112	156	85	90	3	5	6
16	20	12	8	42	6	18	35	13	93	73	111	185	167	81	88	3	5	18
18	30	13	17	52	19	24	36	33	92	83	108	148	175	101	103	9	3	14
32	21	16	9	63	15	20	32	25	95	77	92	178	178	90	105	12	10	14
34	21	15	9	47	9	23	24	24	58	31	91	173	159	76	101	1	3	15
21	22	15	8	29	9	12	24	8	65	67	84	137	186	80	105	0	4	14
28	20	14	14	37	8	18	29	10	61	59	100	214	189	87	100	4	4	13
39	24	14	25	41	14	17	24	11	82	70	104	244	179	92	103	8	4	20
32	26	14	10	47	11	23	27	23	62	39	83	143	173	90	104	7	7	20
28	24	10	8	20	6	10	15	10	61	65	77	159	175	73	103	7	10	10
24	20	16	22	44	11	19	32	18	71	60	94	154	186	100	105	7	7	11
31	19	14	13	28	8	22	26	17	61	49	70	120	186	84	112	3	7	15
29	26	13	25	53	10	22	32	18	85	72	128	202	185	87	111	4	8	9
29	30	13	15	33	7	16	21	12	64	46	74	165	180	88	101	1	4	11
16	23	10	5	42	7	20	27	13	95	56	128	137	172	93	89	1	10	5
25	25	15	26	32	5	7	24	5	46	77	72	121	176	95	108	8	8	17
25	27	11	15	50	6	16	34	13	86	68	99	214	160	83	97	4	6	10
37	31	15	16	54	14	28	31	20	88	79	114	223	173	88	106	5	6	16
30	26	13	19	36	7	21	27	14	89	55	121	222	164	98	103	4	9	16
29	24	16	10	45	9	21	28	17	100	69	121	206	181	85	106	9	7	8
37	34	11	17	56	18	24	31	27	80	70	112	229	166	91	101	10	13	12
28	20	14	4	30	8	18	25	6	73	74	84	161	189	89	106	10	5	15
22	34	14	19	40	10	17	24	15	80	56	101	185	161	86	100	1	4	16
38	21	14	18	56	18	26	37	31	120	69	109	205	179	84	103	5	7	11
29	21	16	18	23	7	16	22	7	67	64	88	180	158	95	97	6	8	17
25	25	18	30	48	9	16	36	16	106	67	127	175	177	88	102	4	14	20
28	27	12	13	16	5	6	12	4	101	65	106	172	177	94	97	10	8	9
23	20	16	18	29	6	12	25	6	43	56	100	145	151	73	95	10	3	8
11	20	15	9	39	13	16	22	15	73	81	73	130	186	92	103	3	7	14
45	37	16	29	32	10	16	30	16	73	69	101	220	178	84	113	4	13	19
19	15	12	7	43	15	19	26	19	101	76	112	116	184	84	92	8	8	17
41	21	10	11	41	9	16	28	14	124	95	119	220	185	83	103	9	11	19
35	30	16	33	49	8	15	29	12	90	64	126	242	174	92	93	6	14	14
34	24	21	16	46	9	14	24	10	89	98	116	236	171	96	105	7	10	13
19	22	15	12	39	10	16	26	17	118	113	116	252	178	86	93	10	11	17
25	21	13	15	40	8	17	25	17	68	42	82	170	145	78	95	3	17	16
36	28	19	33	61	15	24	36	39	81	70	104	210	178	96	97	11	5	19
19	23	10	6	31	7	13	19	19	68	56	97	149	174	94	96	1	1	9
27	21	12	7	34	9	19	27	22	88	62	109	191	171	96	96	4	2	15
21	9	13	14	33	15	25	32	30	68	64	91	181	178	95	100	12	5	17
27	22	11	32	35	8	13	26	13	56	56	75	177	171	81	107	3	11	18
26	22	12	8	43	5	11	28	11	76	51	114	156	171	82	99	5	7	18
20	27	18	15	41	9	19	28	11	130	88	105	241	195	95	115	1	13	16
33	22	14	14	50	13	25	29	26	84	60	127	230	172	79	103	4	9	19
38	26	19	7	39	16	25	28	15	109	72	111	200	182	92	108	11	15	20
33	25	16	34	41	15	23	31	21	109	83	143	246	180	86	109	16	20	20
36	29	17	16	55	9	23	29	23	149	92	156	247	182	84	106	11	15	19
38	29	12	35	55	13	22	27	17	112	78	126	227	178	110	109	11	16	16
31	25	10	28	54	10	25	34	27	103	64	98	168	165	89	104	11	7	14
36	28	17	13	48	11	23	36	18	134	95	102	224	168	92	104	13	19	20
31	26	16	29	58	11	26	37	12	85	74	99	189	198	104	110	7	15	17
28	24	14	6	44	8	17	33	15	92	85	95	215	187	89	108	9	11	17
38	37	15	28	61	10	19	33	19	110	85	135	199	166	82	95	0	19	16
29	34	14	22	48	10	20	22	19	84	53	132	147	184	98	94	5	11	13
35	24	16	15	60	12	20	30	23	92	90	125	232	196	83	106	11	9	18
35	25	18	25	50	11	24	31	19	132	69	118	187	168	85	107	2	11	18
23	21	13	3	54	9	21	24	12	133	65	111	235	182	90	102	12	11	20
31	28	14	25	51	12	23	32	15	139	91	110	199	175	94	108	8	14	18
51	26	23	34	84	18	26	43	38	133	110	161	249	195	112	119	15	20	20
33	28	14	18	60	15	23	29	30	96	89	122	212	178	86	102	7	6	17
21	26	13	17	64	12	16	23	33	118	69	112	132	180	86	101	8	13	12
37	32	17	11	72	16	25	28	32	80	84	95	171	187	104	118	14	18	17
37	20	15	21	36	8	19	33	19	78	45	101	179	174	86	113	5	13	17
37	26	20	29	43	7	19	23	19	102	77	113	210	178	84	104	5	12	11
39	26	15	24	78	17	26	35	30	115	101	136	266	190	101	119	6	4	8
39	34	17	33	45	10	19	26	16	95	75	119	240	172	94	111	7	16	16
18	16	6	4	55	10	21	29	19	68	42	80	125	194	88	103	15	12	14
28	28	14	18	50	10	25	37	23	87	60	93	170	177	88	104	19	13	19
29	23	16	9	38	6	24	27	9	100	63	182	227	169	88	97	6	10	14
25	20	14	11	51	12	19	33	17	111	66	125	206	194	103	102	11	17	19
29	33	16	11	57	13	23	31	26	78	61	103	198	173	79	107	7	9	13
32	21	16	15	55	14	20	28	29	117	72	108	237	171	92	108	6	13	18
30	21	14	21	51	12	24	33	27	96	69	113	206	183	96	107	15	11	20
35	28	14	19	59	18	27	34	33	145	90	117	226	186	97	100	9	8	20
16	34	13	32	60	14	22	29	24	99	58	108	215	188	79	101	5	11	10
38	30	19	33	66	14	22	36	29	97	91	120	252	192	96	102	7	11	17
26	25	12	7	41	10	15	25	13	115	78	129	183	158	95	113	9	13	20
33	28	10	12	37	14	21	33	14	106	88	106	187	173	100	109	8	12	20
28	27	20	32	48	10	19	30	17	69	49	130	198	179	95	105	3	5	14
27	22	13	16	46	8	19	33	15	135	75	142	225	176	89	103	9	4	11
26	29	17	10	53	8	19	29	13	85	91	109	220	181	86	109	7	12	14
30	32	9	26	44	7	15	34	10	109	61	140	178	184	94	103	8	8	20
22	23	17	8	40	4	13	25	17	92	54	81	150	174	87	102	6	3	19
32	24	12	8	52	9	19	29	14	78	77	89	191	187	86	94	4	6	14
31	23	12	13	37	12	19	21	15	82	84	108	182	180	90	108	4	12	15
32	25	13	17	42	5	11	23	16	106	58	143	200	168	87	107	4	10	17
40	21	15	15	39	8	18	24	13	84	67	126	215	180	111	100	10	17	10
21	20	15	11	36	7	19	28	8	80	69	117	235	180	74	101	6	2	14
31	25	15	26	58	15	24	34	23	55	52	80	154	171	85	102	4	6	14
24	24	14	16	44	8	18	22	12	77	74	94	135	175	91	104	8	8	18
41	25	20	15	42	12	21	32	19	64	68	94	189	177	79	105	2	5	11
30	23	11	10	42	8	14	30	12	98	65	132	240	165	92	97	10	12	18
35	20	14	16	55	10	16	26	10	80	78	105	205	171	85	102	5	3	13
34	27	14	17	48	13	25	33	32	77	72	119	195	170	89	114	11	7	16
25	22	13	13	43	7	16	25	11	135	61	126	204	159	76	97	0	3	10
24	25	18	6	42	9	19	31	23	120	97	131	206	194	99	113	26	16	19
36	26	18	17	53	10	19	26	10	56	46	115	180	174	99	98	10	7	12
20	19	19	7	37	8	20	28	6	134	45	110	244	189	92	94	9	9	15
28	24	12	9	31	4	12	27	11	96	72	115	174	172	85	105	7	8	18
34	22	8	13	44	10	17	25	14	126	63	120	162	164	82	96	9	5	14
34	21	17	19	51	10	18	28	14	78	62	103	228	173	99	104	1	8	14
35	28	13	10	45	9	13	26	11	96	63	97	208	189	96	115	10	15	18
37	26	15	24	49	9	17	31	20	70	58	85	204	189	92	112	7	9	18
24	28	18	11	49	8	17	27	7	117	58	112	189	166	75	102	1	4	8
18	24	14	13	31	7	16	23	7	106	54	121	219	162	87	104	2	3	14
28	22	16	15	55	11	23	32	30	92	118	120	274	171	92	105	7	16	17
26	27	14	4	48	11	18	33	14	117	49	124	158	181	87	102	9	4	13
26	24	16	27	51	11	23	39	22	94	87	139	186	184	90	109	25	16	14
